# Supplementary material for: Net primary productivity, upwelling and coastal currents in the Gulf of Ulloa, Baja California, México
Source: Copernicus journal article supplement (doi:10.5194/os-8-703-2012), 2012-08-30
Supplement: Supplementary file 1 [file os-8-703-2012-supplement.pdf]

## Supplementary Material

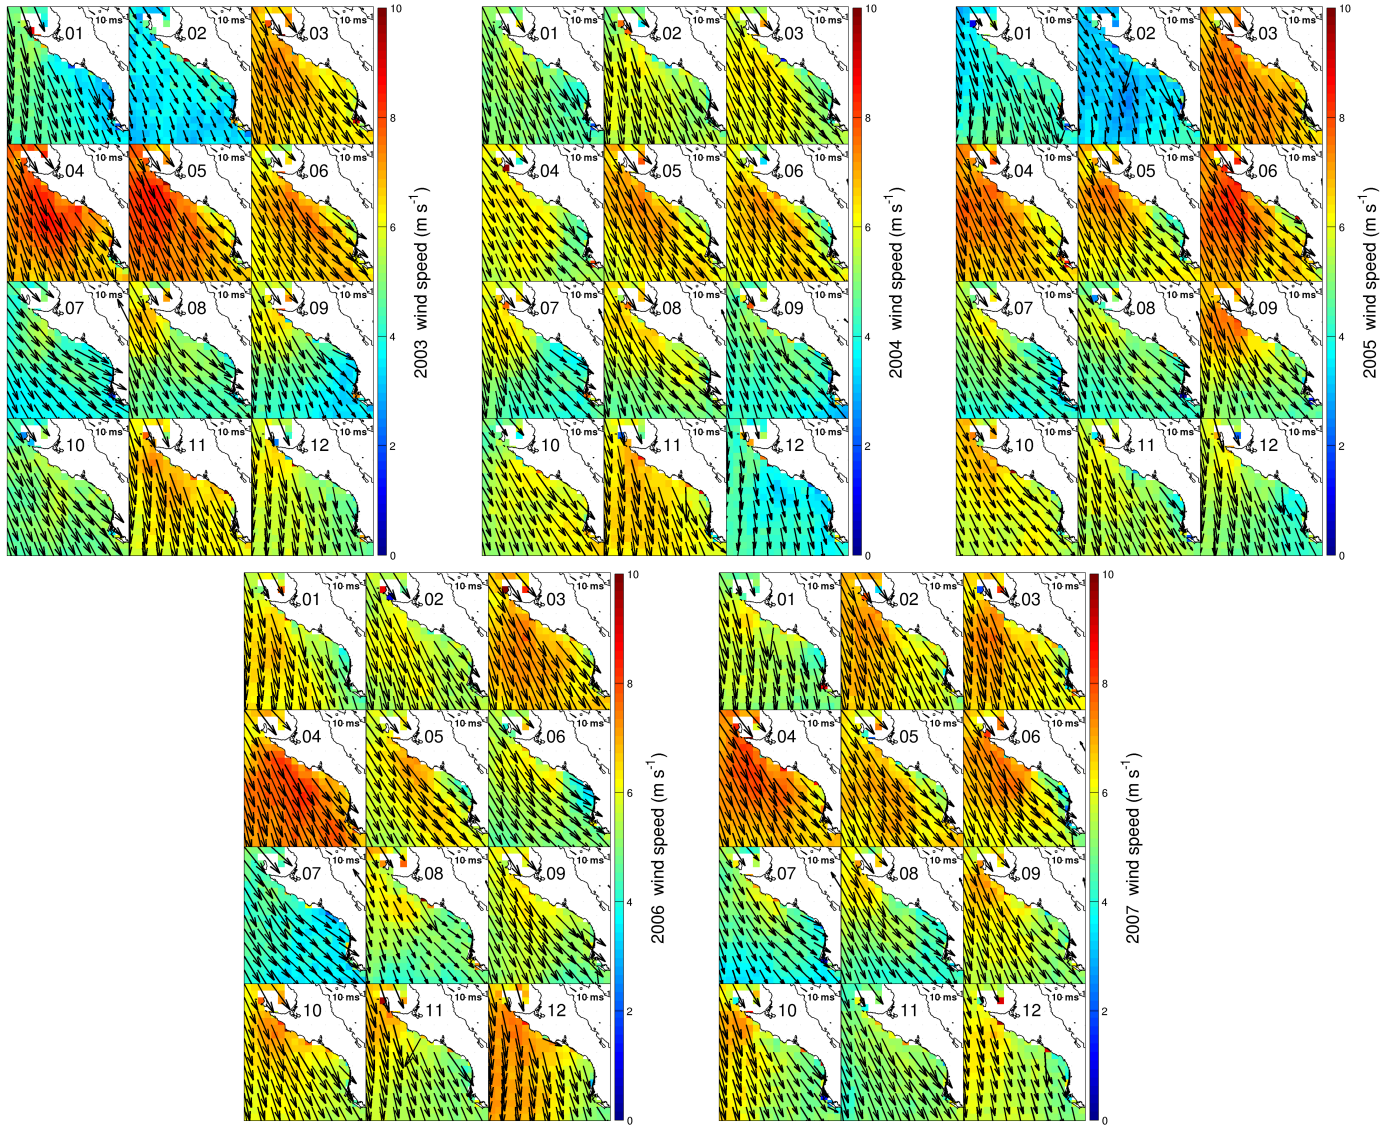

SM 1: Maps of monthly wind speed for 2003-2007. Numbers within each panel indicate the month of the year. For visualization purpose the wind vectors are plotted every other.

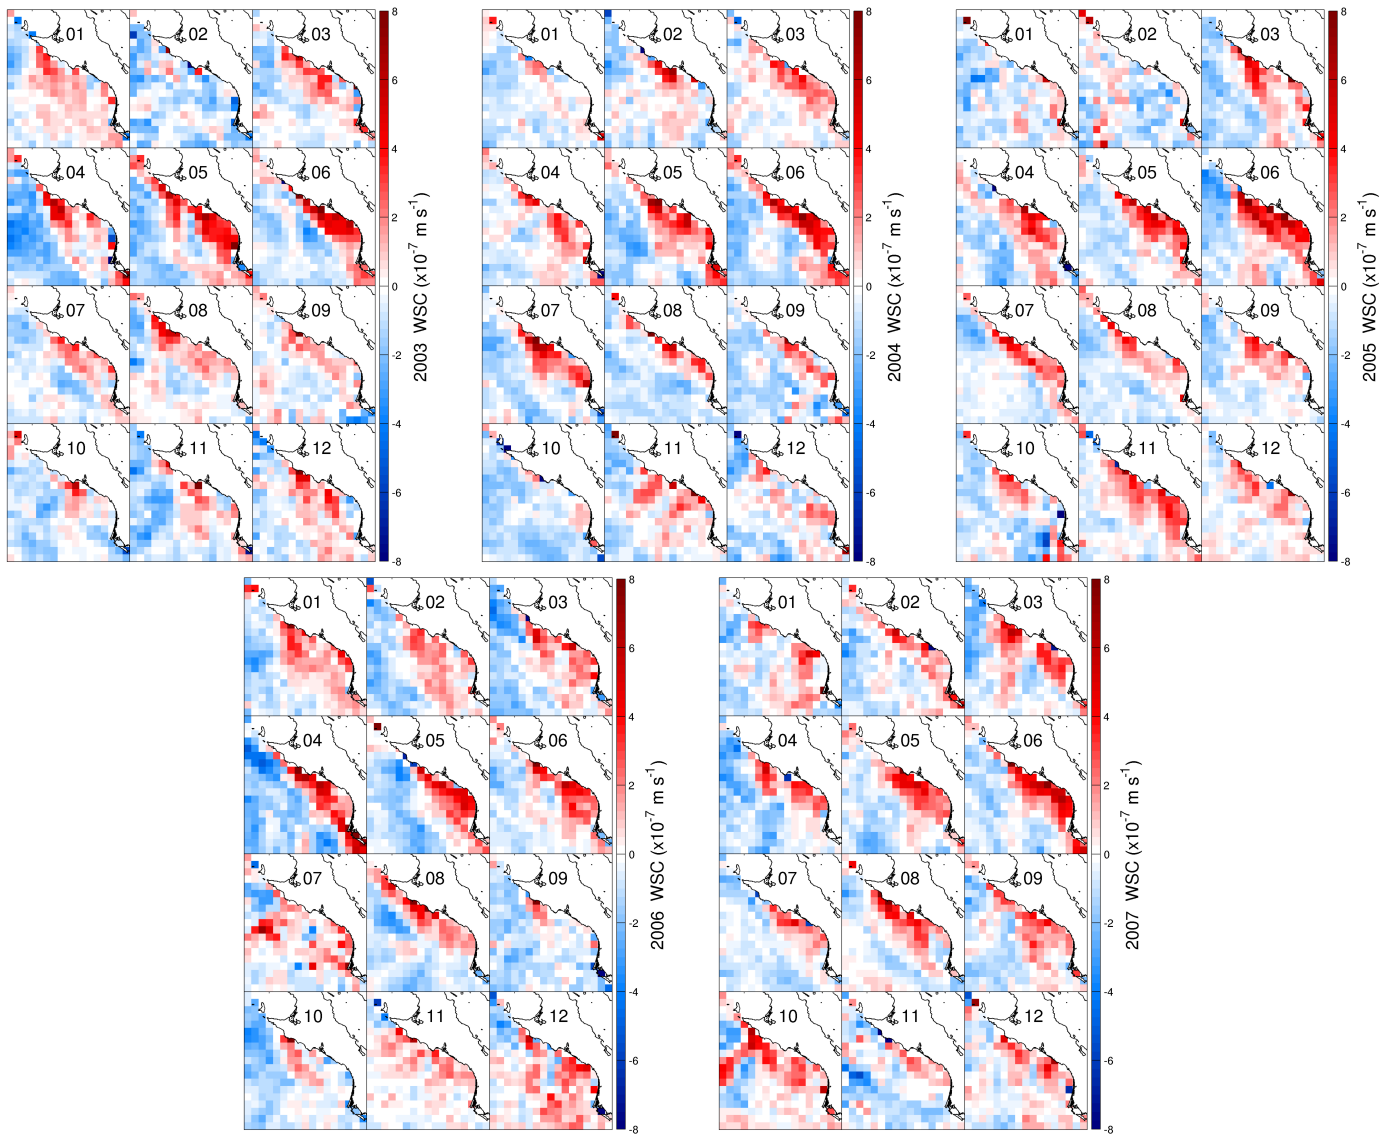

SM 2: Maps of monthly wind stress curl (WSC) for 2003-2007. Numbers within each panel indicate the month of the year.

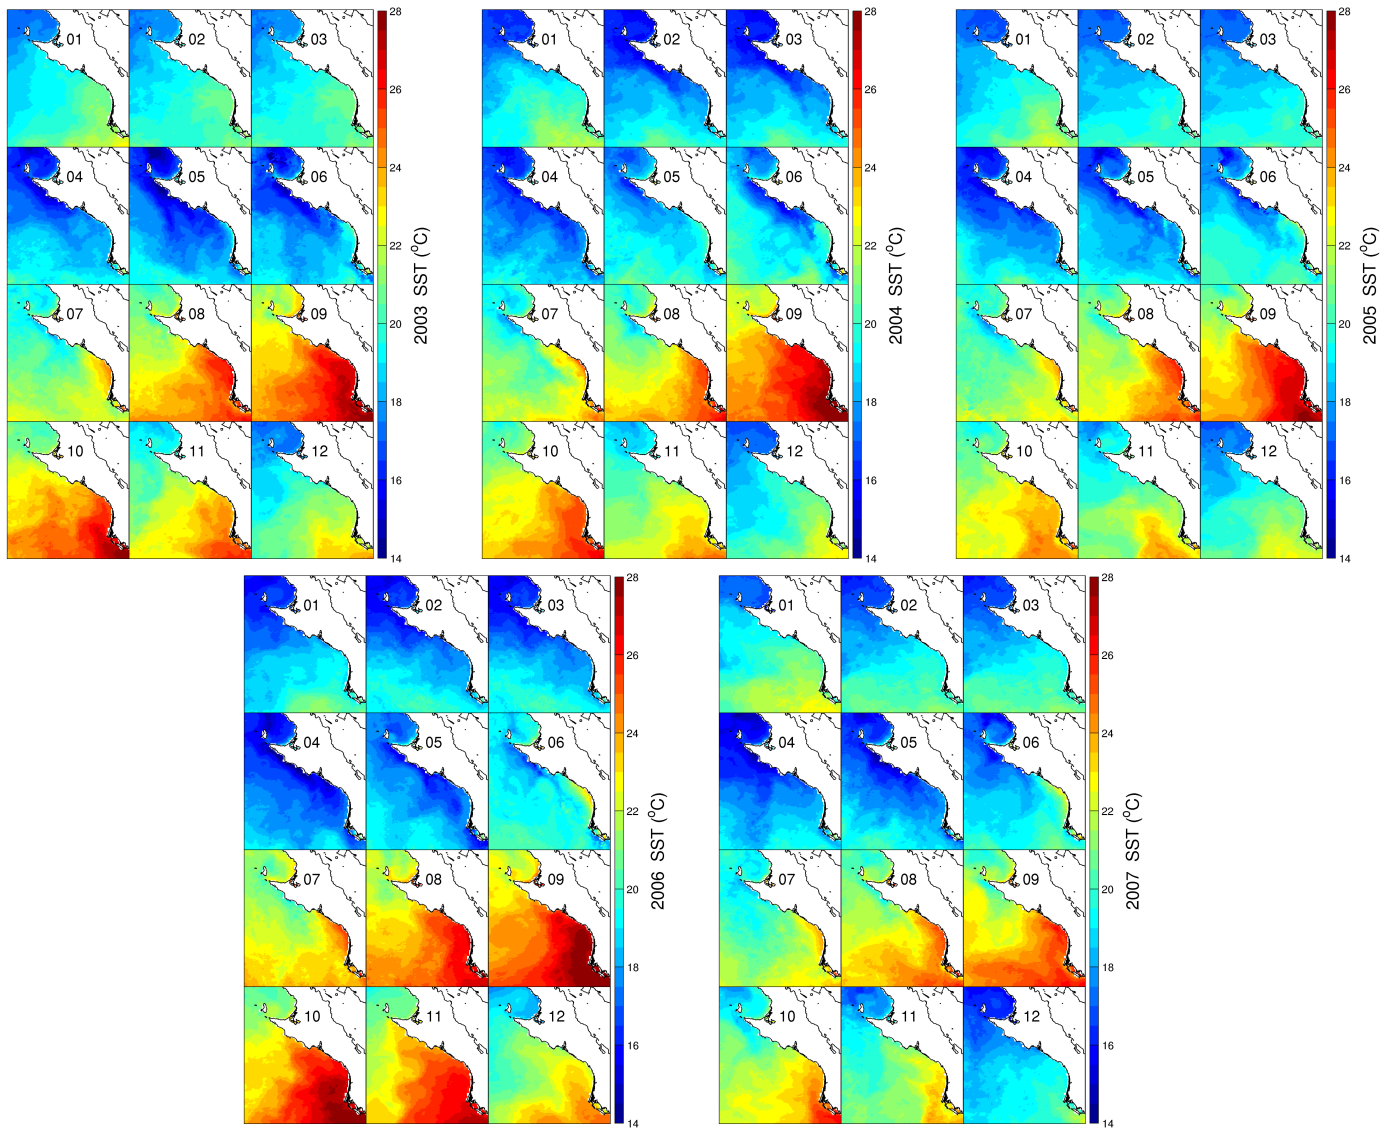

SM 3: Maps of monthly sea surface temperature (SST) for 2003-2007. Numbers within each panel indicate the month of the year.

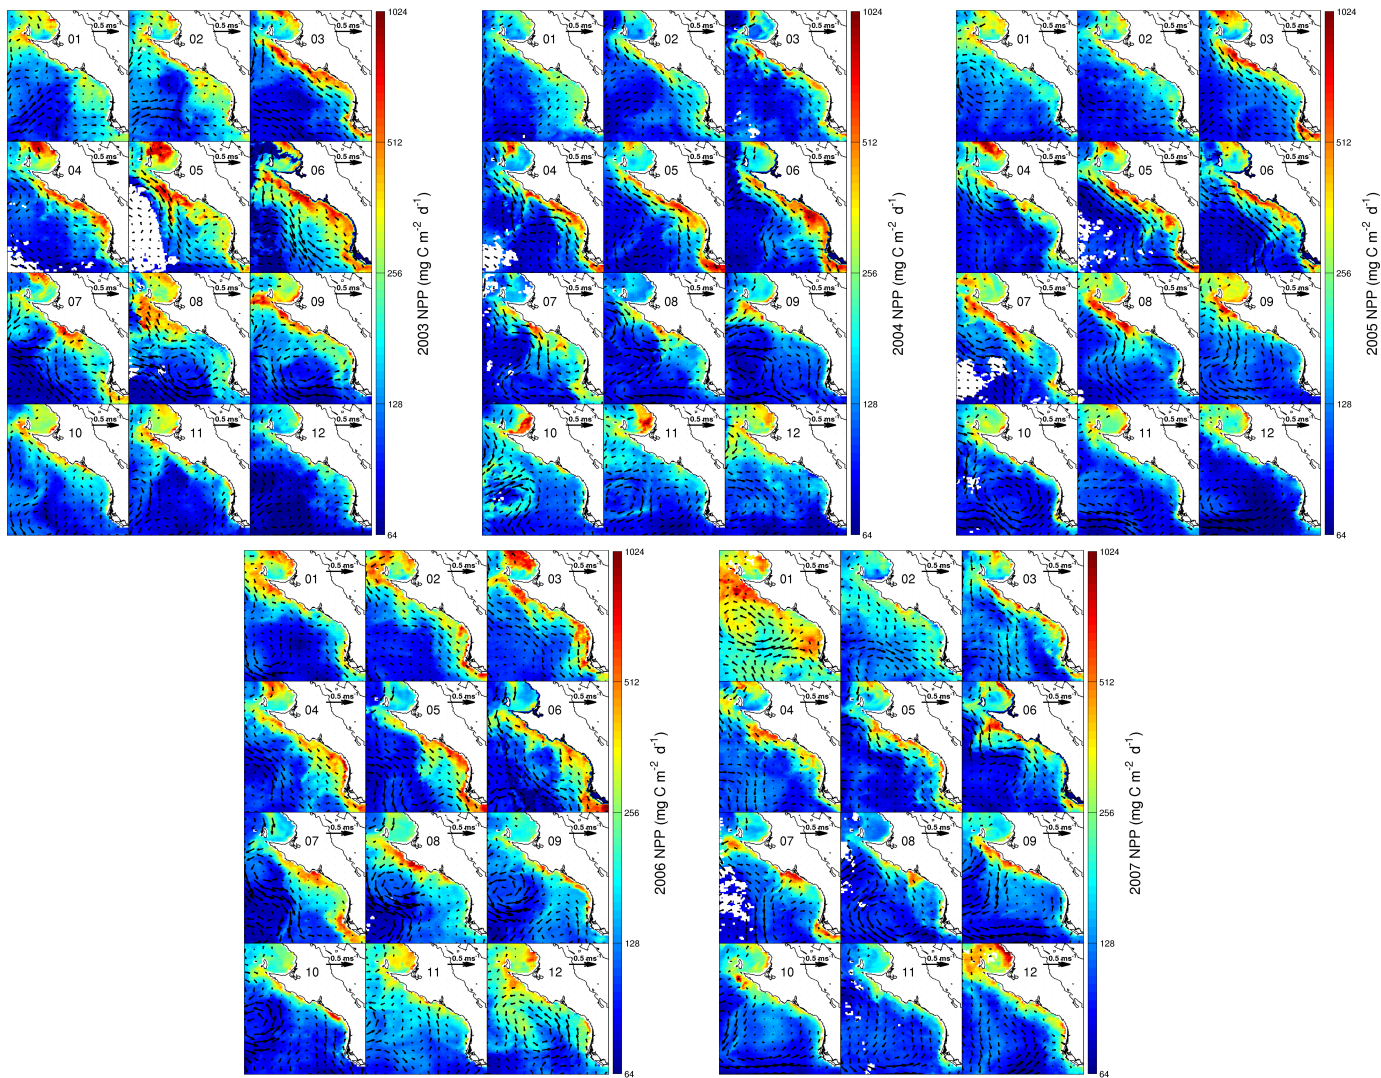

SM 4: Maps of monthly geostrophic currents superimposed over net primary productivity (NPP) in logarithmic scale for 2003-2007. Numbers within each panel indicate the month of the year.
